# Supplementary material for: Changes in Antioxidant Enzymes Activity and Metabolomic Profiles in the Guts of Honey Bee (Apis mellifera) Larvae Infected with Ascosphaera apis
Source: MDPI journal article supplement (doi:10.3390/insects11070419), 2020-07-06
Supplement: s1 [file s1]

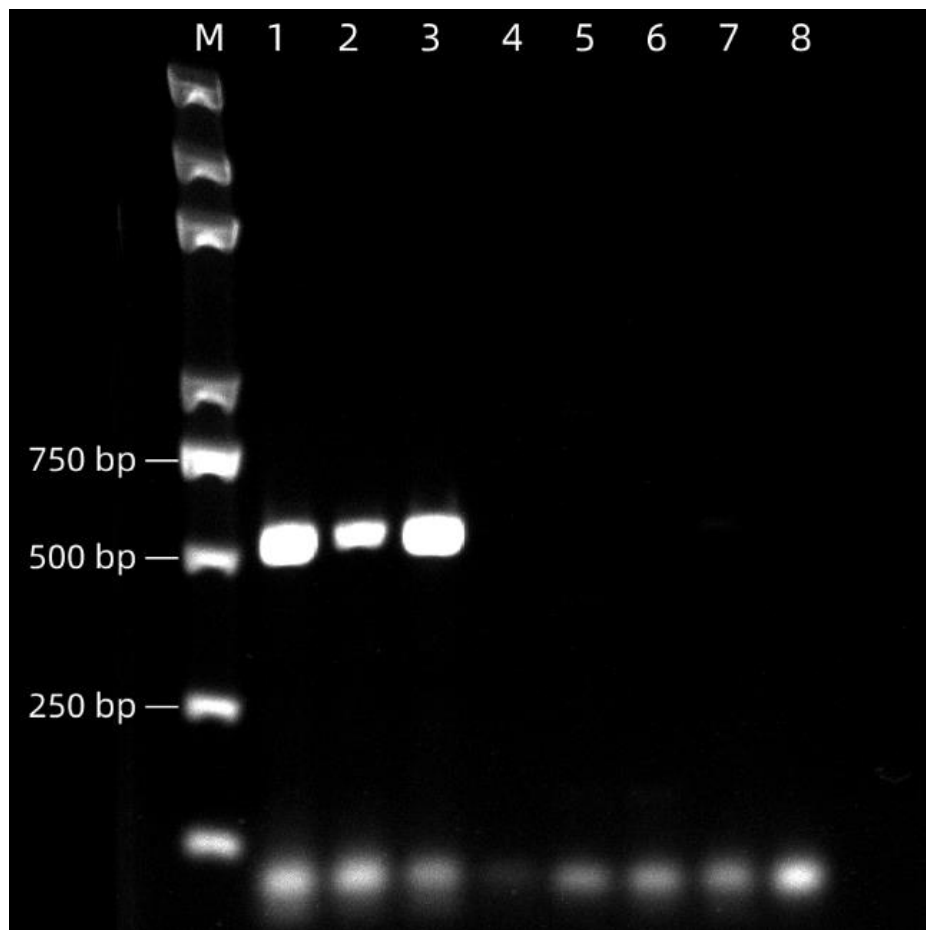

**Figure S1.** Detection of *A. apis* in the gut sample from *A. apis*-infected larvae and controls by PCR test at 3 days post-infection. The gut samples (lanes 1-3) from the *A. apis*-infected larvae were positive for *A. apis* infection (550 bp), and the gut samples (lanes 5-7) from the control larvae were negative for *A. apis* infection. M indicates DNA markers; lanes 4 and 8: negative controls (no template) for guts samples of *A. apis*-infected larvae and controls respectively.
