# Supplementary material for: Changes in Antioxidant Enzymes Activity and Metabolomic Profiles in the Guts of Honey Bee (Apis mellifera) Larvae Infected with Ascosphaera apis
Source: MDPI journal article supplement (doi:10.3390/insects11070419), 2020-07-06
Supplement: s1 [file s1]

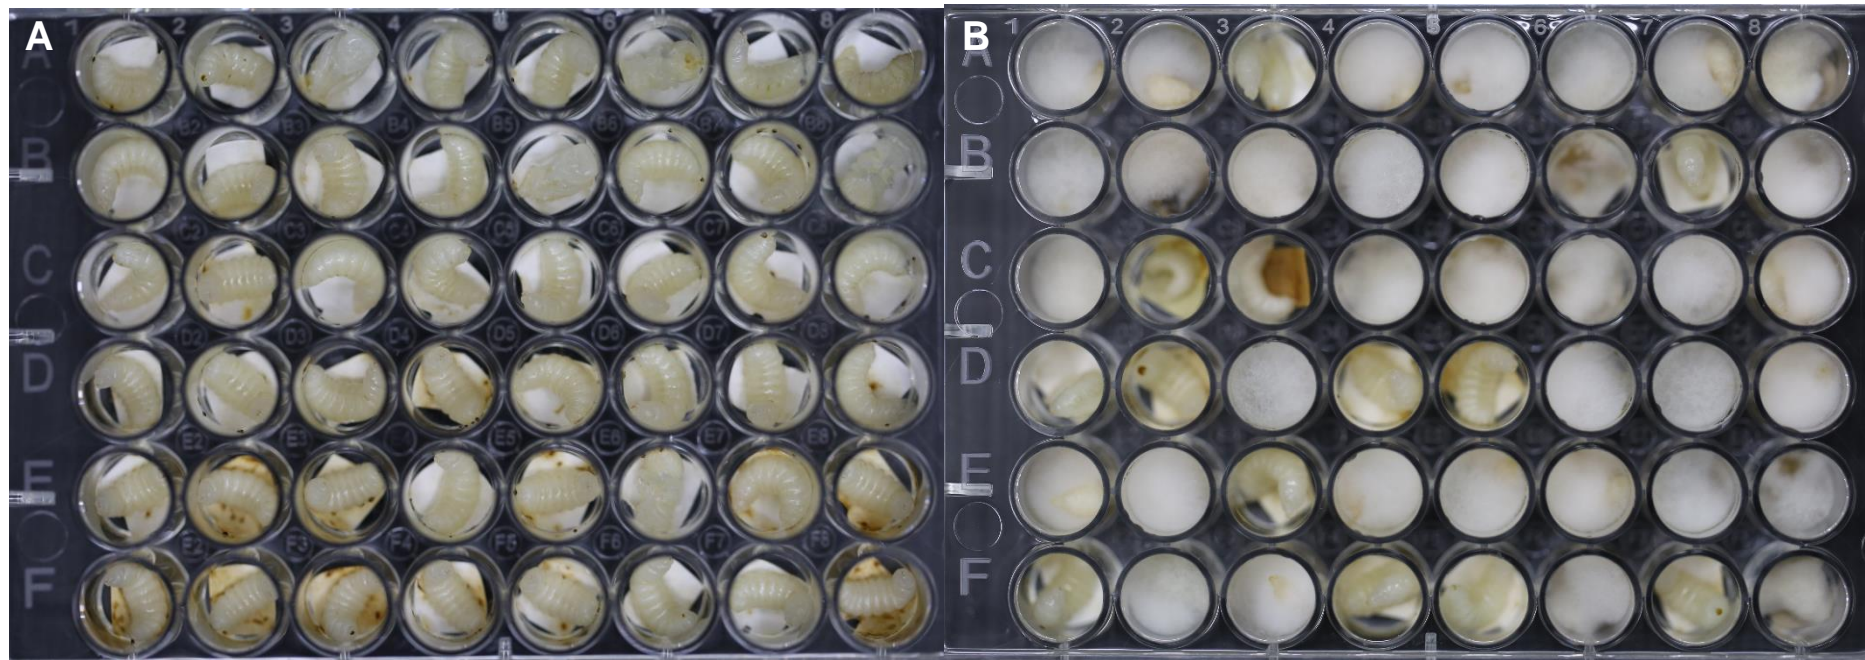

**Figure S2.** All the control larvae developed well without any obvious disease symptoms (A); the *Apis*-infected larvae developed typical chalkbrood symptoms at 6 days post-infection (B), and the percentage of larvae covered with white, cotton-like mycelium was 77% (37/48) in this 48-well microtiter plate.
